# Supplementary material for: Effect of Aluminum Flakes on Corrosion Protection Behavior of Water-Based Hybrid Zinc-Rich Coatings for Carbon Steel Substrate in NaCl Environment
Source: MDPI journal article supplement (doi:10.3390/coatings12101390), 2022-09-23
Supplement: s1 [file s1]

# Effect of Aluminum Flakes on Corrosion Protection Behavior of Water-Based Hybrid Zinc-Rich Coatings for Carbon Steel Substrate in NaCl Environment

Arthur Boidot <sup>1,2</sup>, Frederic Gheno <sup>2</sup>, Fouad Bentiss <sup>1,3</sup>, Charafeddine Jama <sup>1,\*</sup> and Jean-Bernard Vogt <sup>1</sup>

<sup>1</sup> UMR 8207—UMET—Unité Matériaux et Transformations, Centrale Lille, INRAE, CNRS, University Lille, F-59000 Lille, France

<sup>2</sup> Nof Metal Coatings Europe SA, 120 Rue Galilée—CS 50093, CEDEX, 60106 Creil, France

<sup>3</sup> Laboratory of Catalysis and Corrosion of Materials, Faculty of Sciences, Chouaib Doukkali University, P.O. Box 20, El Jadida M-24000, Morocco

\* Correspondence: charafeddine.jama@centralelille.fr

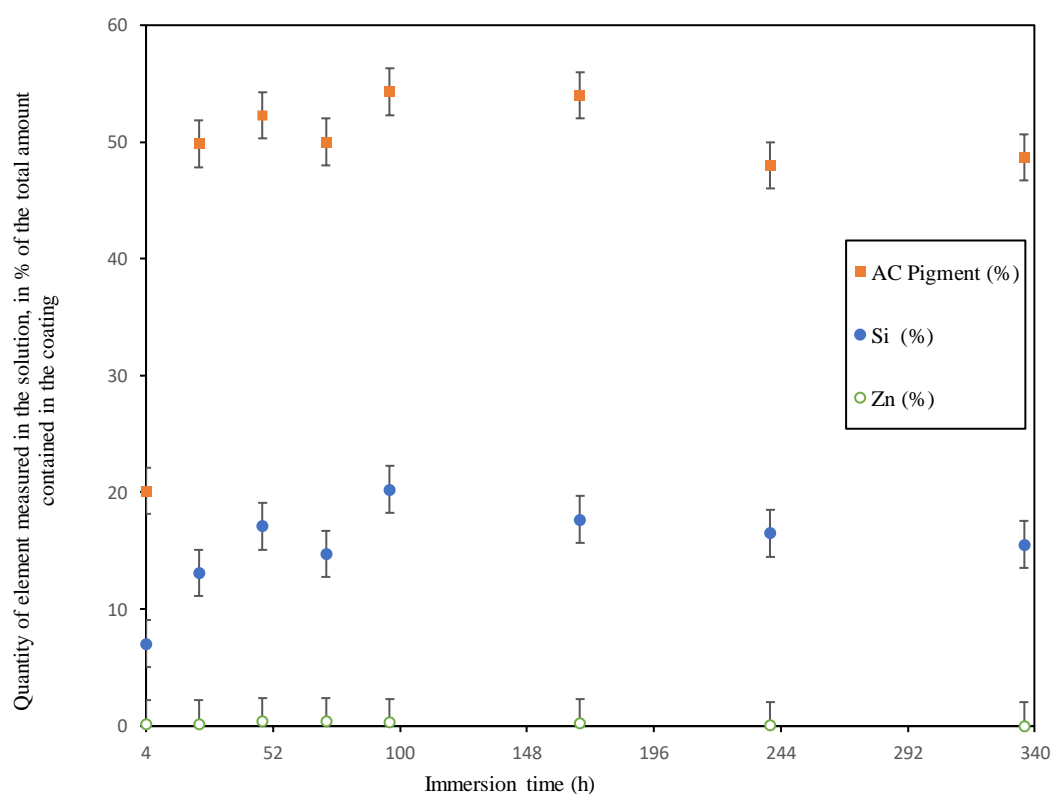

**Figure S1.** Evolution of the quantity of element detected by ICP-OES over immersion time for coating B.

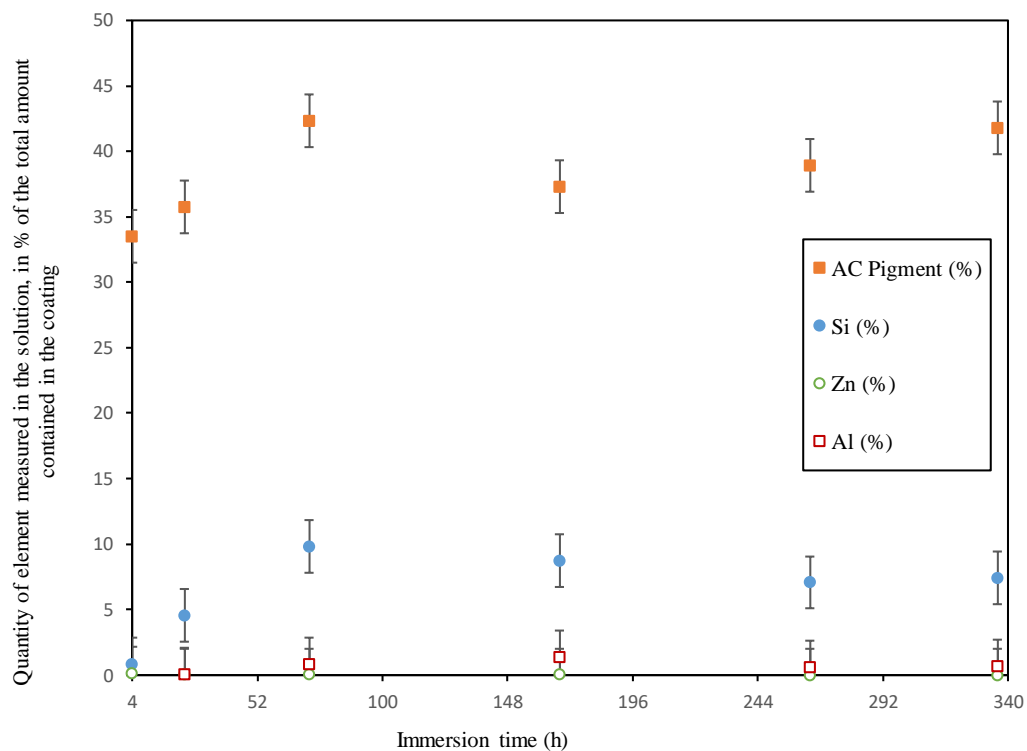

**Figure S2.** Evolution of the quantity of element detected by ICP-OES over immersion time for coating C.

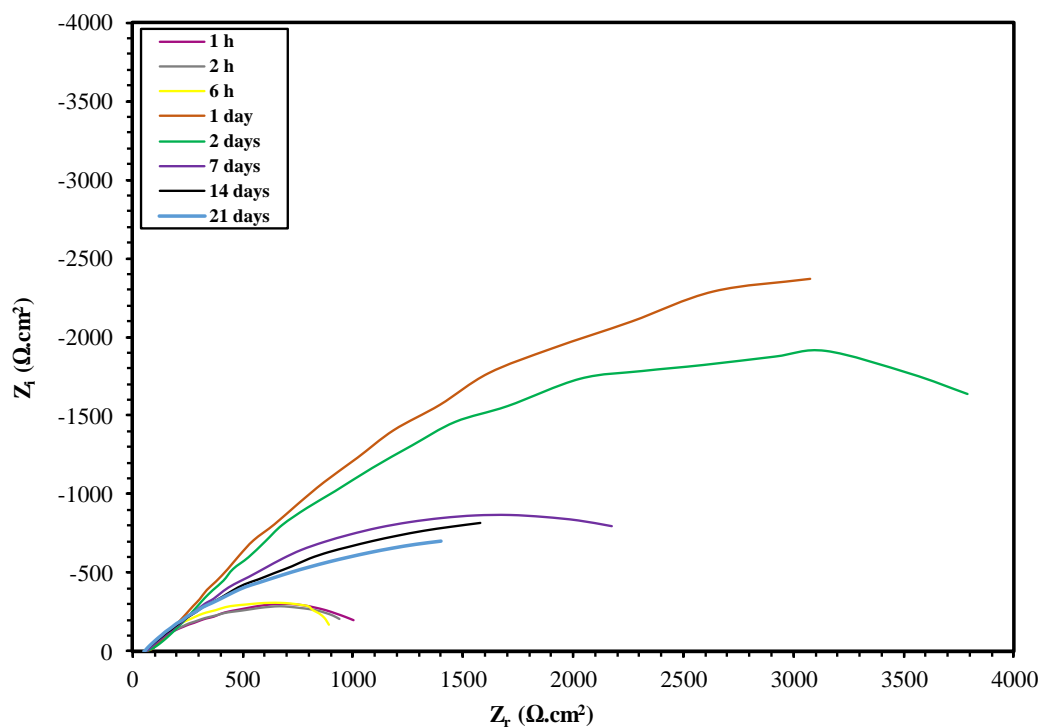

**Figure S3.** Nyquist diagrams of the coating B during immersion time in 3 wt% NaCl water solution.

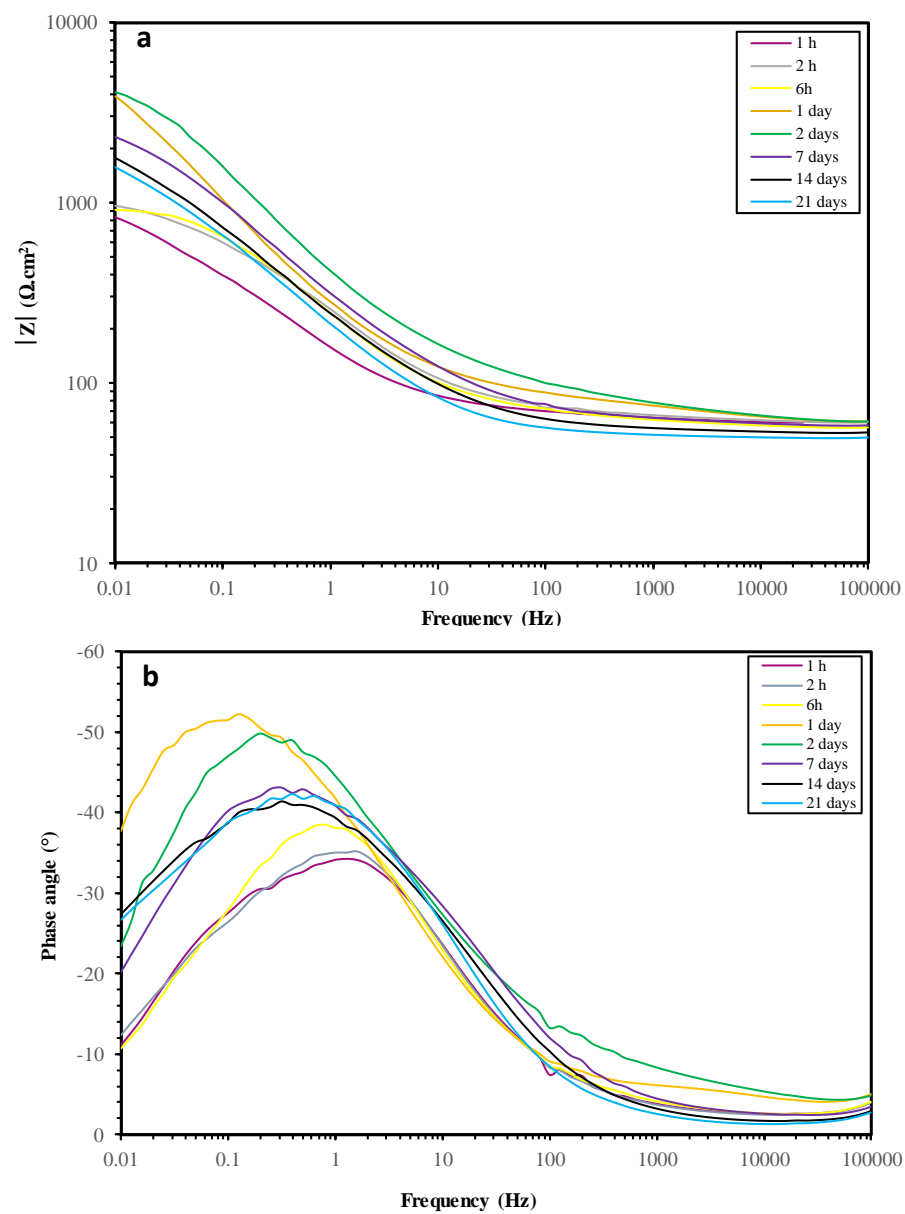

**Figure S4.** Bode ((a) Modulus and (b) Phase) diagrams of the coating B during immersion time in 3 wt% NaCl water solution.

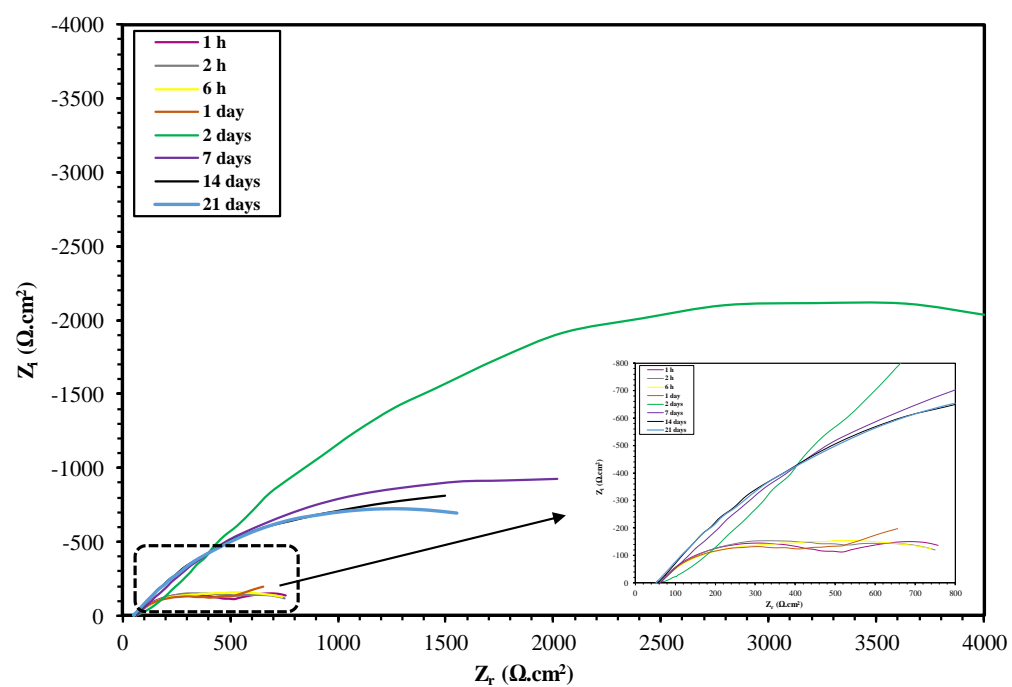

**Figure S5.** Nyquist diagrams of the coating C during immersion time in 3 wt% NaCl water solution.

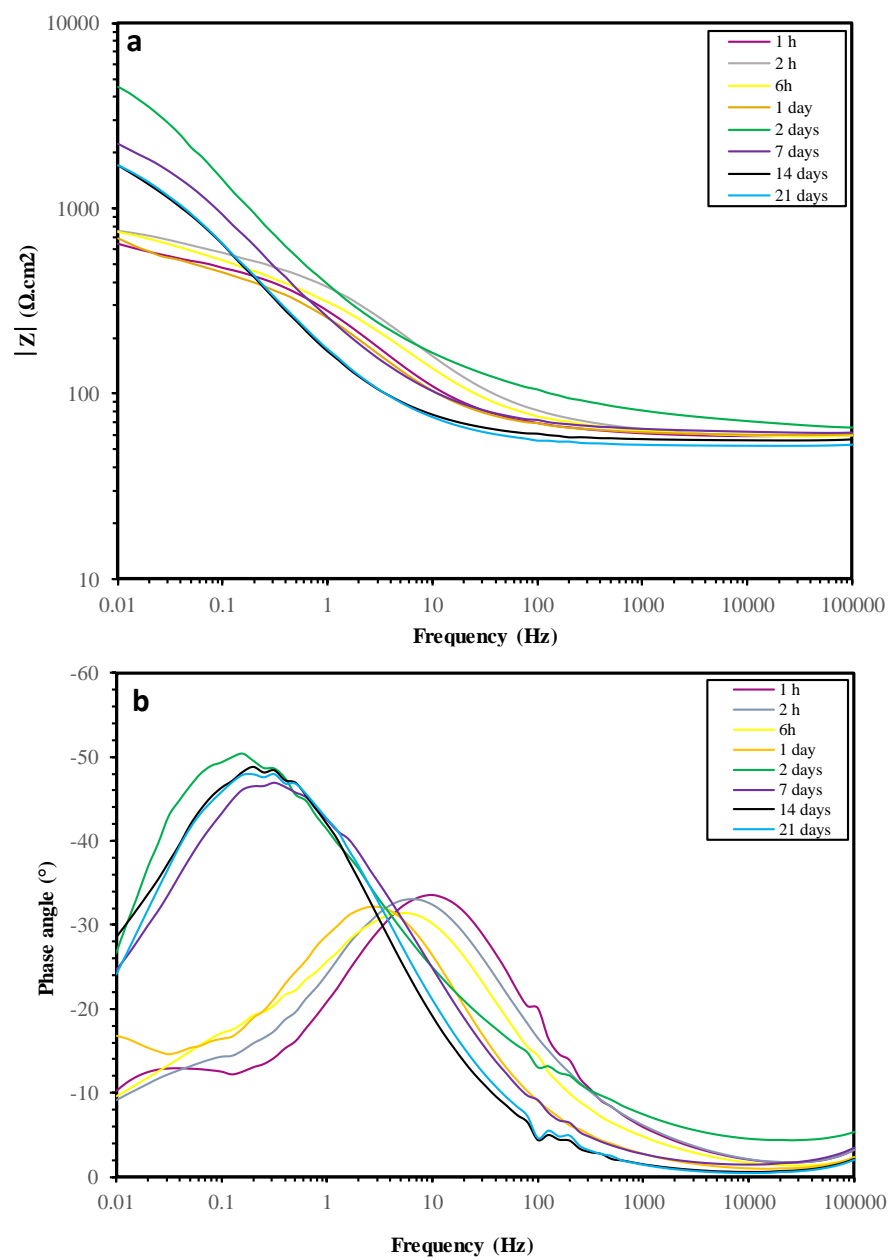

**Figure S6.** Bode (Modulus (a) and Phase (b)) diagrams of the coating C during immersion time in 3 wt% NaCl water solution.

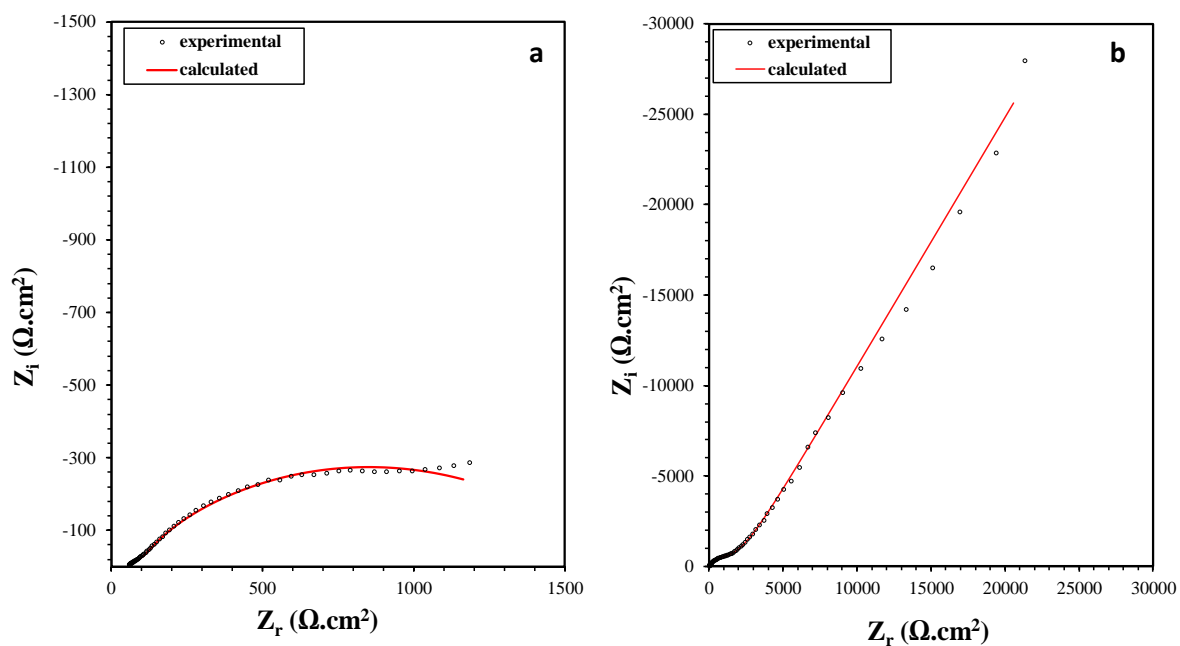

**Figure S7.** Nyquist diagrams of coating A after 2h of immersion fitted with model 1 (a) and after 14 days of immersion fitted with model 2 (b).

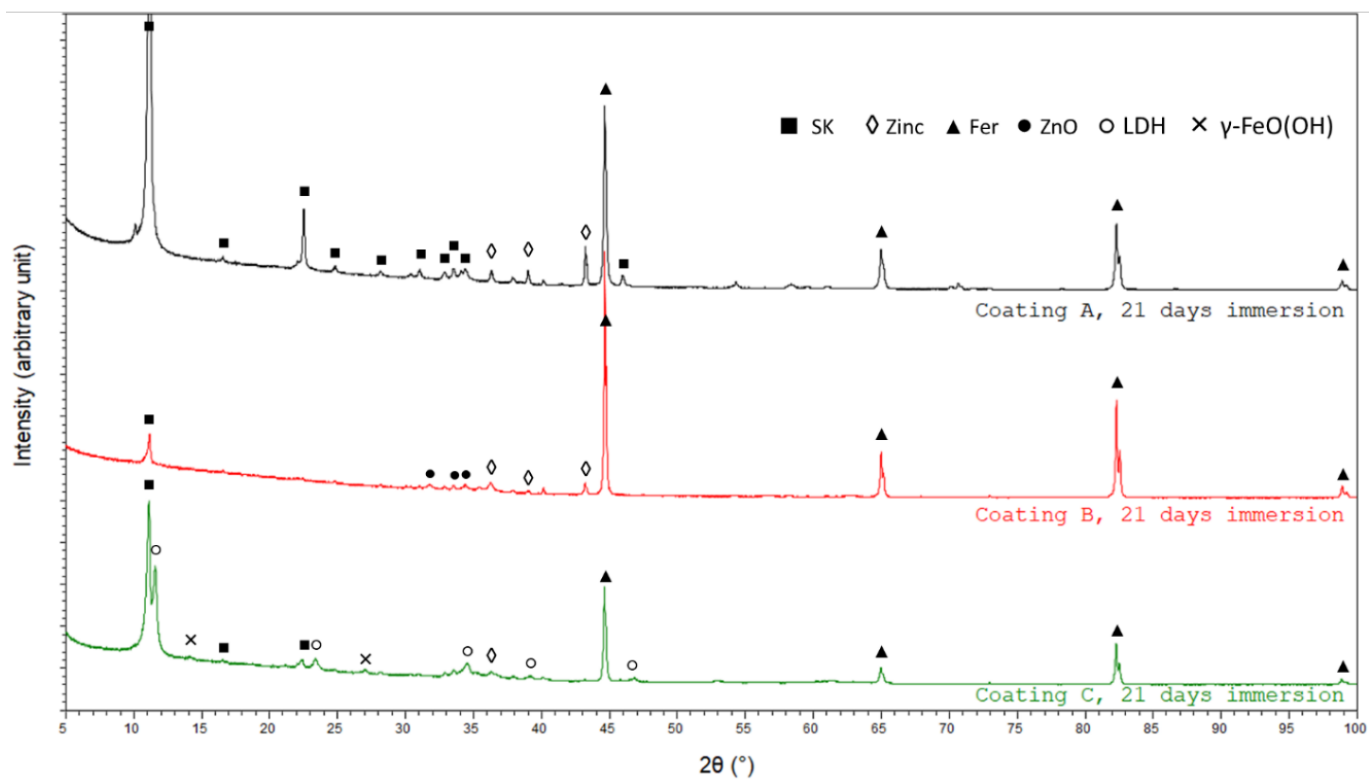

**Figure S8.** Diffractograms of the surface of coatings A, B and C after 21 days of exposure in 3 wt% NaCl water solution.

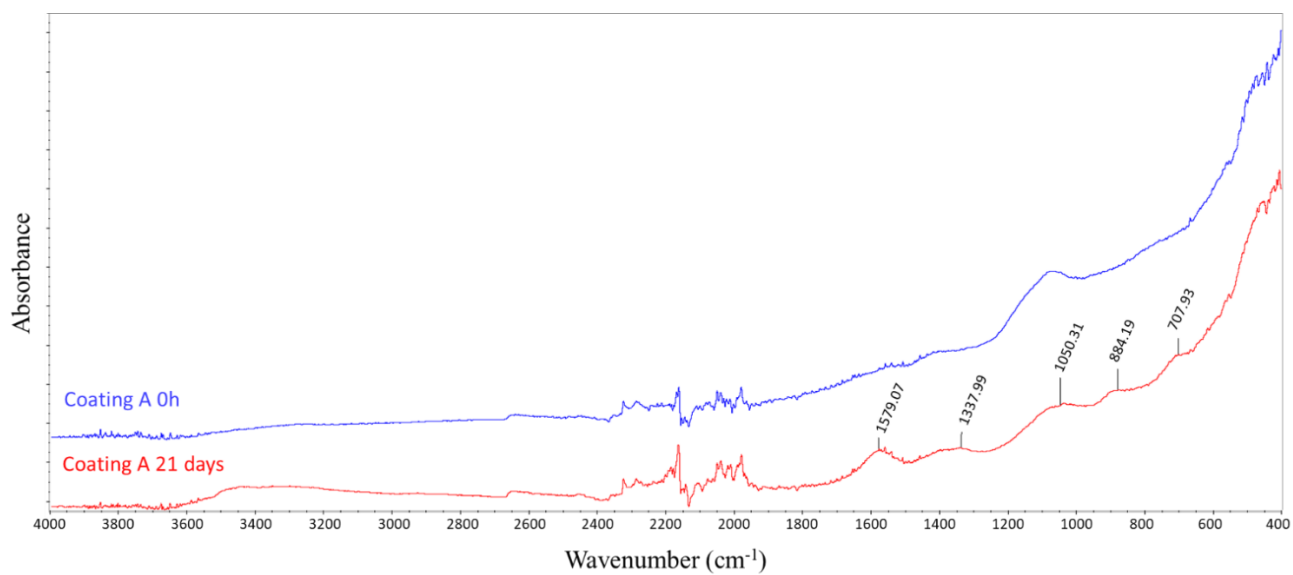

**Figure S9.** ATR-FTIR spectra of the coating A before and after exposure to 3 wt% NaCl water solution.

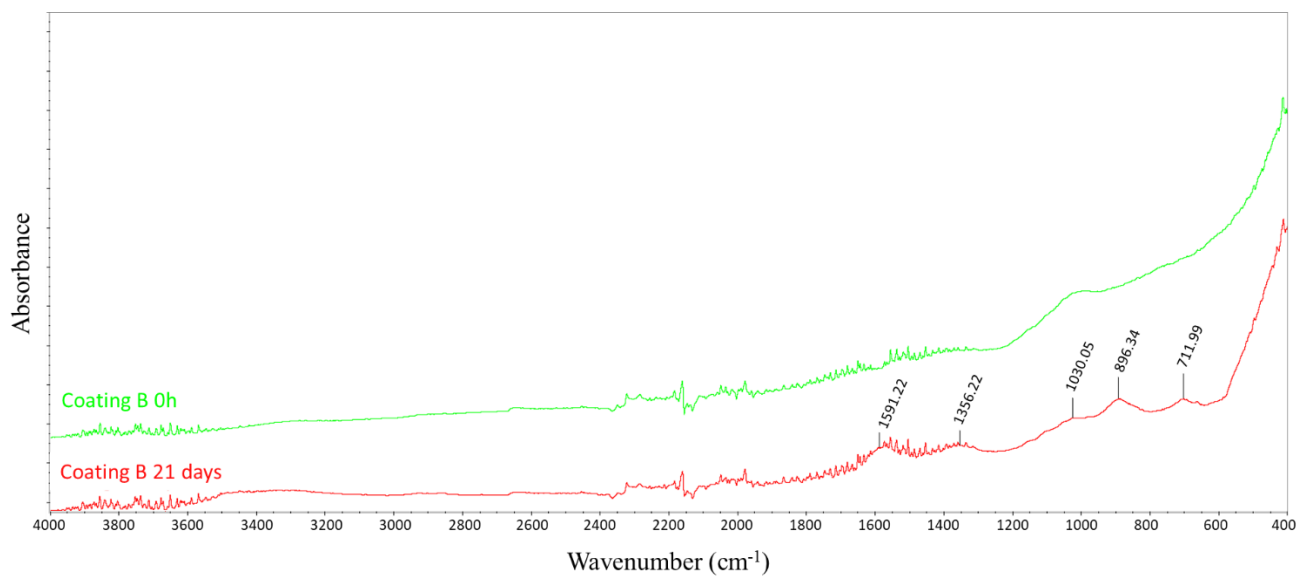

**Figure S10.** ATR-FTIR spectra of the coating B before and after exposure to 3 wt% NaCl water solution.

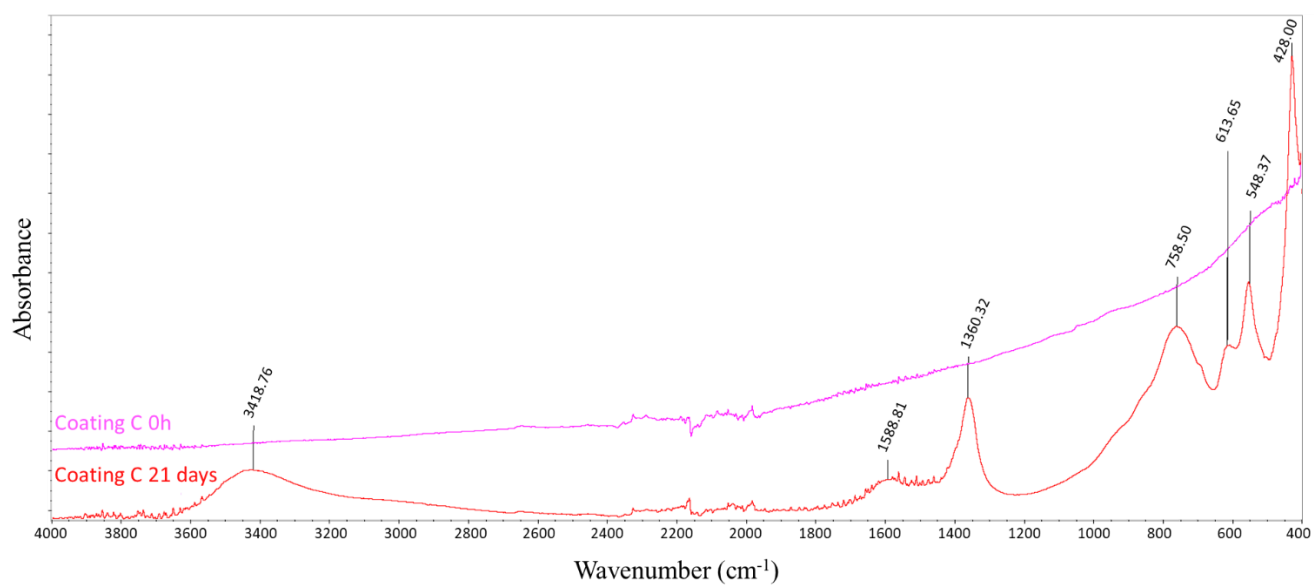

**Figure S11.** ATR-FTIR spectra of the coating C before and after exposure to 3 wt% NaCl water solution.
